# Supplementary material for: Comparison of Kinetic Models Applied for Transport Description in Polymer Inclusion Membranes
Source: MDPI journal article supplement (doi:10.3390/membranes13020236), 2023-02-16
Supplement: s1 [file s1]

**Table. S1.** List of differential equations used in an appropriate models.

| Model No. | Scheme | V=f(t) | Differential equations                                                                                                                                                           |
|-----------|--------|--------|----------------------------------------------------------------------------------------------------------------------------------------------------------------------------------|
| 1         | A→B    | NO     | $\frac{dc_f}{dt} = -k_1 c_f$ $\frac{dc_s}{dt} = \frac{V_f}{V_s} k_1 c_f$                                                                                                         |
| 1a        | A→B    | YES    | $\frac{dc_f}{dt} = -k_1 c_f$ $\frac{dc_s}{dt} = \frac{V_f}{V_s} k_1 c_f$                                                                                                         |
| 2         | A↔B    | YES    | $\frac{dc_s}{dt} = \frac{V_f}{V_s} k_1 c_f - k_{-1} c_s$ $\frac{dc_f}{dt} = -k_1 c_f + \frac{V_s}{V_f} k_{-1} c_s$                                                               |
| 3         | A→B→C  | YES    | $\frac{dc_{LM}}{dt} = \frac{V_f}{V_{LM}} k_1 c_f - k_2 c_{LM}$ $\frac{dc_s}{dt} = \frac{V_{LM}}{V_s} k_2 c_{LM}$ $\frac{dc_f}{dt} = -k_1 c_f + \frac{V_{LM}}{V_f} k_{-1} c_{LM}$ |
| 4         | A↔B→C  | YES    | $\frac{dc_{LM}}{dt} = \frac{V_f}{V_{LM}} k_1 c_f - k_{-1} c_{LM} - k_2 c_{LM}$ $\frac{dc_s}{dt} = \frac{V_{LM}}{V_s} k_2 c_{LM}$                                                 |
| 5         | A→B    | YES    | $\frac{dc_f}{dt} = -k_1$                                                                                                                                                         |

**Table S2.** Atomic absorption spectroscopy operating parameters.

| Element | Wavelength (nm) | Slit (nm) |
|---------|-----------------|-----------|
| Cd(II)  | 228.8           | 0.5       |
| Zn(II)  | 213.9           | 1.0       |
| Pb(II)  | 283.3           | 1.0       |
| Cu(II)  | 324.8           | 0.5       |

**Table S3.** The calculated kinetic parameters and initial maximum fluxes for the system with TOPO as a carrier.

| Ion    | No. | Scheme | $V = f(t)$ | $k_1$<br>[1/cm]              | $k_{-1}$<br>[1/cm]           | $k_2$<br>[1/cm]              | $J_M$<br>[mol/cm <sup>2</sup> s] |
|--------|-----|--------|------------|------------------------------|------------------------------|------------------------------|----------------------------------|
| Cd(II) | 1   | A→B    | NO         | 1.229×10 <sup>-5</sup>       |                              |                              | 3.006×10 <sup>-10</sup>          |
|        | 1a  | A→B    | YES        | 1.203×10 <sup>-5</sup>       |                              |                              | 2.926×10 <sup>-10</sup>          |
|        | 2   | A↔B    | YES        | 1.202×10 <sup>-5</sup>       | 5.030×10 <sup>-14</sup>      |                              | 2.924×10 <sup>-10</sup>          |
|        | 3   | A→B→C  | YES        | <b>1.248×10<sup>-5</sup></b> |                              | <b>2.504×10<sup>-4</sup></b> | <b>3.036×10<sup>-10</sup></b>    |
|        | 4   | A↔B→C  | YES        | 1.228×10 <sup>-5</sup>       | 4.456×10 <sup>-9</sup>       | 2.637×10 <sup>-4</sup>       | 2.989×10 <sup>-10</sup>          |
| Zn(II) | 1   | A→B    | NO         | 1.437×10 <sup>-5</sup>       |                              |                              | 3.400×10 <sup>-10</sup>          |
|        | 1a  | A→B    | YES        | 1.416×10 <sup>-5</sup>       |                              |                              | 3.332×10 <sup>-10</sup>          |
|        | 2   | A↔B    | YES        | 1.416×10 <sup>-5</sup>       | 1.803×10 <sup>-13</sup>      |                              | 3.332×10 <sup>-10</sup>          |
|        | 3   | A→B→C  | YES        | <b>1.478×10<sup>-5</sup></b> |                              | <b>3.280×10<sup>-4</sup></b> | <b>3.477×10<sup>-10</sup></b>    |
|        | 4   | A↔B→C  | YES        | 1.445×10 <sup>-5</sup>       | 1.216×10 <sup>-8</sup>       | 3.365×10 <sup>-4</sup>       | 3.400×10 <sup>-10</sup>          |
| Pb(II) | 1   | A→B    | NO         | 1.020×10 <sup>-6</sup>       |                              |                              | 2.411×10 <sup>-11</sup>          |
|        | 1a  | A→B    | YES        | 9.953×10 <sup>-7</sup>       |                              |                              | 2.342×10 <sup>-11</sup>          |
|        | 2   | A↔B    | YES        | <b>1.056×10<sup>-6</sup></b> | <b>4.270×10<sup>-7</sup></b> |                              | <b>2.485×10<sup>-11</sup></b>    |
|        | 3   | A→B→C  | YES        | 9.954×10 <sup>-7</sup>       |                              | 9.990×10 <sup>-2</sup>       | 2.342×10 <sup>-11</sup>          |
|        | 4   | A↔B→C  | YES        | 9.956×10 <sup>-7</sup>       | 2.575×10 <sup>-7</sup>       | 9.988×10 <sup>-2</sup>       | 2.342×10 <sup>-11</sup>          |

**Table S4.** The calculated kinetic parameters and initial maximum fluxes for the system with Aliquat 336 as a carrier.

| Ion    | No. | Scheme | $V = f(t)$ | $k_1$<br>[1/cm]              | $k_{-1}$<br>[1/cm]           | $k_2$<br>[1/cm]              | $J_M$<br>[mol/cm <sup>2</sup> s] |
|--------|-----|--------|------------|------------------------------|------------------------------|------------------------------|----------------------------------|
| Cd(II) | 1   | A→B    | NO         | 1.410×10 <sup>-5</sup>       |                              |                              | 3.476×10 <sup>-10</sup>          |
|        | 1a  | A→B    | YES        | 1.365×10 <sup>-5</sup>       |                              |                              | 3.347×10 <sup>-10</sup>          |
|        | 2   | A↔B    | YES        | 1.364×10 <sup>-5</sup>       | 3.661×10 <sup>-15</sup>      |                              | 3.345×10 <sup>-10</sup>          |
|        | 3   | A→B→C  | YES        | <b>1.516×10<sup>-5</sup></b> |                              | <b>8.377×10<sup>-5</sup></b> | <b>3.718×10<sup>-10</sup></b>    |
|        | 4   | A↔B→C  | YES        | 1.516×10 <sup>-5</sup>       | 9.358×10 <sup>-15</sup>      | 8.373×10 <sup>-5</sup>       | 3.718×10 <sup>-10</sup>          |
| Zn(II) | 1   | A→B    | NO         | 6.263×10 <sup>-6</sup>       |                              |                              | 1.512×10 <sup>-10</sup>          |
|        | 1a  | A→B    | NO         | 1.365×10 <sup>-5</sup>       |                              |                              | 3.347×10 <sup>-10</sup>          |
|        | 2   | A↔B    | NO         | 6.133×10 <sup>-6</sup>       | 5.749×10 <sup>-14</sup>      |                              | 1.473×10 <sup>-10</sup>          |
|        | 3   | A→B→C  | YES        | 6.993×10 <sup>-6</sup>       |                              | 4.524×10 <sup>-5</sup>       | 1.680×10 <sup>-10</sup>          |
|        | 4   | A↔B→C  | YES        | <b>6.743×10<sup>-6</sup></b> | <b>3.573×10<sup>-9</sup></b> | <b>4.527×10<sup>-5</sup></b> | <b>1.620×10<sup>-10</sup></b>    |
| Pb(II) | 1   | A→B    | NO         | 1.365×10 <sup>-6</sup>       |                              |                              | 3.340×10 <sup>-11</sup>          |
|        | 1a  | A→B    | YES        | 1.341×10 <sup>-6</sup>       |                              |                              | 3.265×10 <sup>-11</sup>          |
|        | 2   | A↔B    | YES        | 1.341×10 <sup>-6</sup>       | 8.388×10 <sup>-13</sup>      |                              | 3.265×10 <sup>-11</sup>          |
|        | 3   | A→B→C  | YES        | 1.381×10 <sup>-6</sup>       |                              | 1.071×10 <sup>-4</sup>       | 3.363×10 <sup>-11</sup>          |
|        | 4   | A↔B→C  | YES        | <b>1.406×10<sup>-6</sup></b> | <b>3.701×10<sup>-9</sup></b> | <b>7.518×10<sup>-5</sup></b> | <b>3.424×10<sup>-11</sup></b>    |

**Table S5.** The calculated kinetic parameters and initial maximum fluxes for the system with Cyphos IL 101 as a carrier.

| Ion    | No. | Scheme | $V = f(t)$ | $k_1$<br>[1/cm]              | $k_{-1}$<br>[1/cm]           | $k_2$<br>[1/cm]              | $J_M$<br>[mol/cm <sup>2</sup> s] |
|--------|-----|--------|------------|------------------------------|------------------------------|------------------------------|----------------------------------|
| Cd(II) | 1   | A→B    | NO         | 1.301×10 <sup>-5</sup>       |                              |                              | 3.206×10 <sup>-10</sup>          |
|        | 1a  | A→B    | NO         | 1.251×10 <sup>-5</sup>       |                              |                              | 3.067×10 <sup>-10</sup>          |
|        | 2   | A↔B    | YES        | 1.251×10 <sup>-5</sup>       | 6.881×10 <sup>-13</sup>      |                              | 3.067×10 <sup>-10</sup>          |
|        | 3   | A→B→C  | YES        | <b>1.322×10<sup>-5</sup></b> |                              | <b>1.605×10<sup>-4</sup></b> | <b>3.240×10<sup>-10</sup></b>    |
|        | 4   | A↔B→C  | YES        | 1.322×10 <sup>-5</sup>       | 3.125×10 <sup>-15</sup>      | 1.605×10 <sup>-4</sup>       | 3.241×10 <sup>-10</sup>          |
| Zn(II) | 1   | A→B    | NO         | 9.179×10 <sup>-6</sup>       |                              |                              | 2.254×10 <sup>-10</sup>          |
|        | 1a  | A→B    | NO         | 8.965×10 <sup>-6</sup>       |                              |                              | 2.190×10 <sup>-10</sup>          |
|        | 2   | A↔B    | NO         | 8.965×10 <sup>-6</sup>       | 2.171×10 <sup>-13</sup>      |                              | 2.190×10 <sup>-10</sup>          |
|        | 3   | A→B→C  | NO         | 9.444×10 <sup>-6</sup>       |                              | 1.313×10 <sup>-4</sup>       | 2.307×10 <sup>-10</sup>          |
|        | 4   | A↔B→C  | YES        | <b>9.145×10<sup>-6</sup></b> | <b>5.183×10<sup>-9</sup></b> | <b>1.431×10<sup>-4</sup></b> | <b>2.234×10<sup>-10</sup></b>    |
| Pb(II) | 1   | A→B    | NO         | 3.077×10 <sup>-6</sup>       |                              |                              | 7.189×10 <sup>-11</sup>          |
|        | 1a  | A→B    | NO         | 3.011×10 <sup>-6</sup>       |                              |                              | 7.000×10 <sup>-11</sup>          |
|        | 2   | A↔B    | NO         | 3.011×10 <sup>-6</sup>       | 1.032×10 <sup>-13</sup>      |                              | 7.000×10 <sup>-11</sup>          |
|        | 3   | A→B→C  | YES        | <b>3.084×10<sup>-6</sup></b> |                              | <b>1.762×10<sup>-4</sup></b> | <b>7.170×10<sup>-11</sup></b>    |
|        | 4   | A↔B→C  | YES        | 3.084×10 <sup>-6</sup>       | 2.668×10 <sup>-10</sup>      | 1.766×10 <sup>-4</sup>       | 7.168×10 <sup>-11</sup>          |
| Cu(II) | 1   | A→B    | NO         | 2.917×10 <sup>-8</sup>       |                              |                              | 7.139×10 <sup>-13</sup>          |
|        | 1a  | A→B    | NO         | 2.840×10 <sup>-8</sup>       |                              |                              | 6.916×10 <sup>-13</sup>          |
|        | 2   | A↔B    | YES        | <b>4.559×10<sup>-8</sup></b> | <b>4.029×10<sup>-6</sup></b> |                              | <b>1.110×10<sup>-12</sup></b>    |
|        | 3   | A→B→C  | NO         | 2.840×10 <sup>-8</sup>       |                              | 39.87                        | 6.916×10 <sup>-13</sup>          |
|        | 4   | A↔B→C  | NO         | 2.975×10 <sup>-8</sup>       | 9.148×10 <sup>-5</sup>       | 37.90                        | 6.917×10 <sup>-13</sup>          |

**Table S6.** The calculated kinetic parameters and initial maximum fluxes for the system with D2EHPA as a carrier.

| Ion    | No. | Scheme | $V = f(t)$ | $k_1$<br>[1/cm]              | $k_{-1}$<br>[1/cm]           | $k_2$<br>[1/cm]              | $J_M$<br>[mol/cm <sup>2</sup> s] |
|--------|-----|--------|------------|------------------------------|------------------------------|------------------------------|----------------------------------|
| Cd(II) | 1   | A→B    | YES        | 2.006×10 <sup>-6</sup>       |                              |                              | 4.684×10 <sup>-11</sup>          |
|        | 1a  | A→B    | YES        | 1.957×10 <sup>-6</sup>       |                              |                              | 4.548×10 <sup>-11</sup>          |
|        | 2   | A↔B    | YES        | 1.971×10 <sup>-6</sup>       | 4.014×10 <sup>-8</sup>       |                              | 4.579×10 <sup>-11</sup>          |
|        | 3   | A→B→C  | YES        | <b>2.047×10<sup>-6</sup></b> |                              | <b>7.760×10<sup>-5</sup></b> | <b>4.757×10<sup>-11</sup></b>    |
|        | 4   | A↔B→C  | YES        | 2.002×10 <sup>-6</sup>       | 4.421×10 <sup>-16</sup>      | 1.482×10 <sup>-4</sup>       | 4.652×10 <sup>-11</sup>          |
| Zn(II) | 1   | A→B    | NO         | 1.508×10 <sup>-5</sup>       |                              |                              | 3.514×10 <sup>-10</sup>          |
|        | 1a  | A→B    | NO         | 1.472×10 <sup>-5</sup>       |                              |                              | 3.413×10 <sup>-10</sup>          |
|        | 2   | A↔B    | NO         | 1.475×10 <sup>-5</sup>       | 1.668×10 <sup>-8</sup>       |                              | 3.421×10 <sup>-10</sup>          |
|        | 3   | A→B→C  | YES        | <b>1.521×10<sup>-5</sup></b> |                              | <b>3.570×10<sup>-4</sup></b> | <b>3.527×10<sup>-10</sup></b>    |
|        | 4   | A↔B→C  | YES        | 1.514×10 <sup>-5</sup>       | 1.314×10 <sup>-9</sup>       | 3.634×10 <sup>-4</sup>       | 3.512×10 <sup>-10</sup>          |
| Pb(II) | 1   | A→B    | NO         | 1.178×10 <sup>-5</sup>       |                              |                              | 2.792×10 <sup>-10</sup>          |
|        | 1a  | A→B    | YES        | 1.165×10 <sup>-5</sup>       |                              |                              | 2.747×10 <sup>-10</sup>          |
|        | 2   | A↔B    | YES        | 1.165×10 <sup>-5</sup>       | 3.608×10 <sup>-13</sup>      |                              | 2.747×10 <sup>-10</sup>          |
|        | 3   | A→B→C  | NO         | 1.222×10 <sup>-5</sup>       |                              | 2.293×10 <sup>-4</sup>       | 2.881×10 <sup>-10</sup>          |
|        | 4   | A↔B→C  | YES        | <b>1.197×10<sup>-5</sup></b> | <b>9.125×10<sup>-9</sup></b> | <b>2.235×10<sup>-4</sup></b> | <b>2.822×10<sup>-10</sup></b>    |
| Cu(II) | 1   | A→B    | YES        | 8.925×10 <sup>-7</sup>       |                              |                              | 2.180×10 <sup>-11</sup>          |
|        | 1a  | A→B    | NO         | 8.729×10 <sup>-7</sup>       |                              |                              | 2.121×10 <sup>-11</sup>          |
|        | 2   | A↔B    | YES        | <b>9.978×10<sup>-7</sup></b> | <b>9.512×10<sup>-7</sup></b> |                              | <b>2.425×10<sup>-11</sup></b>    |
|        | 3   | A→B→C  | NO         | 8.729×10 <sup>-7</sup>       |                              | 9.983×10 <sup>-2</sup>       | 2.121×10 <sup>-11</sup>          |
|        | 4   | A↔B→C  | NO         | 8.731×10 <sup>-7</sup>       | 2.355×10 <sup>-5</sup>       | 10.32                        | 2.122×10 <sup>-11</sup>          |

**Table S7.** The calculated kinetic parameters and initial maximum fluxes for the system with reactive ionic liquid (RILC8\_Br) as a carrier

| Ion    | No. | Scheme | $V = f(t)$ | $k_1$<br>[1/cm]                          | $k_{-1}$<br>[1/cm]                       | $k_2$<br>[1/cm] | $J_M$<br>[mol/cm <sup>2</sup> s]          |
|--------|-----|--------|------------|------------------------------------------|------------------------------------------|-----------------|-------------------------------------------|
| Cd(II) | 1   | A→B    | NO         | $3.197 \times 10^{-6}$                   |                                          |                 | $7.499 \times 10^{-11}$                   |
|        | 1a  | A→B    | NO         | $3.111 \times 10^{-6}$                   |                                          |                 | $7.260 \times 10^{-11}$                   |
|        | 2   | A↔B    | YES        | <b><math>3.938 \times 10^{-6}</math></b> | <b><math>1.565 \times 10^{-6}</math></b> |                 | <b><math>9.190 \times 10^{-11}</math></b> |
|        | 3   | A→B→C  | NO         | $3.111 \times 10^{-6}$                   |                                          | 18.03           | $7.260 \times 10^{-11}$                   |
|        | 4   | A↔B→C  | NO         | $3.111 \times 10^{-6}$                   | $2.264 \times 10^{-4}$                   | 98.93           | $7.260 \times 10^{-11}$                   |
| Zn(II) | 1   | A→B    | NO         | $5.914 \times 10^{-7}$                   |                                          |                 | $1.386 \times 10^{-11}$                   |
|        | 1a  | A→B    | NO         | $5.767 \times 10^{-7}$                   |                                          |                 | $1.345 \times 10^{-11}$                   |
|        | 2   | A↔B    | YES        | <b><math>1.035 \times 10^{-6}</math></b> | <b><math>4.822 \times 10^{-6}</math></b> |                 | <b><math>2.389 \times 10^{-11}</math></b> |
|        | 3   | A→B→C  | NO         | $5.768 \times 10^{-7}$                   |                                          | 25.47           | $1.345 \times 10^{-11}$                   |
|        | 4   | A↔B→C  | NO         | $5.770 \times 10^{-7}$                   | $4.157 \times 10^{-5}$                   | 17.04           | $1.346 \times 10^{-11}$                   |
| Pb(II) | 1   | A→B    | YES        | $4.588 \times 10^{-7}$                   |                                          |                 | $1.076 \times 10^{-11}$                   |
|        | 1a  | A→B    | YES        | $4.498 \times 10^{-7}$                   |                                          |                 | $1.049 \times 10^{-11}$                   |
|        | 2   | A↔B    | YES        | <b><math>5.762 \times 10^{-7}</math></b> | <b><math>1.876 \times 10^{-6}</math></b> |                 | <b><math>1.344 \times 10^{-11}</math></b> |
|        | 3   | A→B→C  | YES        | $4.498 \times 10^{-7}$                   |                                          | 59.27           | $1.049 \times 10^{-11}$                   |
|        | 4   | A↔B→C  | YES        | $4.500 \times 10^{-7}$                   | $1.056 \times 10^{-5}$                   | 4.436           | $1.050 \times 10^{-11}$                   |

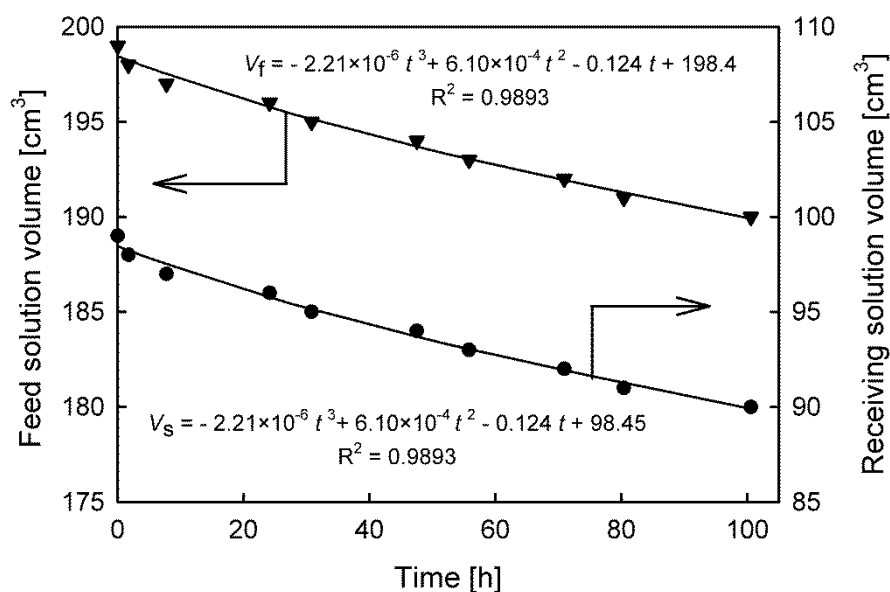

Figure S1. The 3<sup>rd</sup> degree polynomial fitting to the experimental results for system with D2EHPA as a carrier.

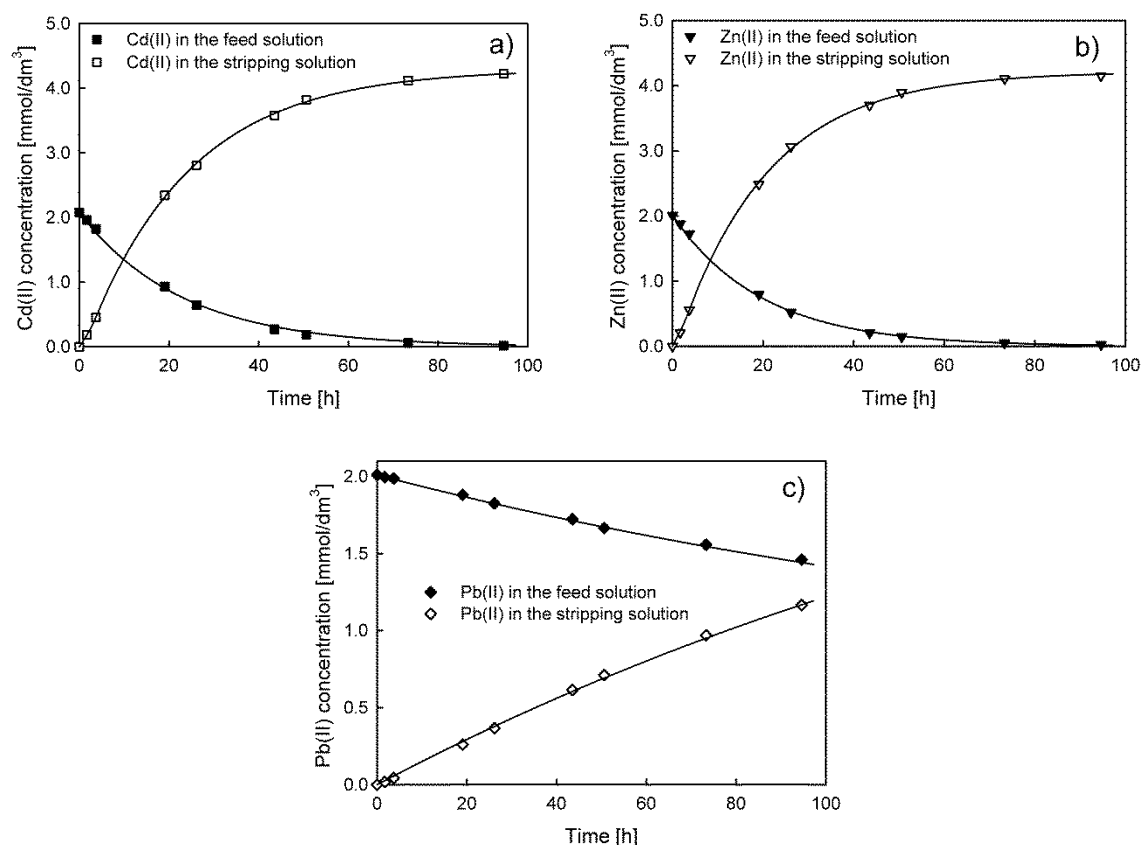

Figure S2. The best fitted models for predicting Cd(II) (a), Zn(II) (b), and Pb(II) (c) ions transport through PIM with TOPO as a carrier.

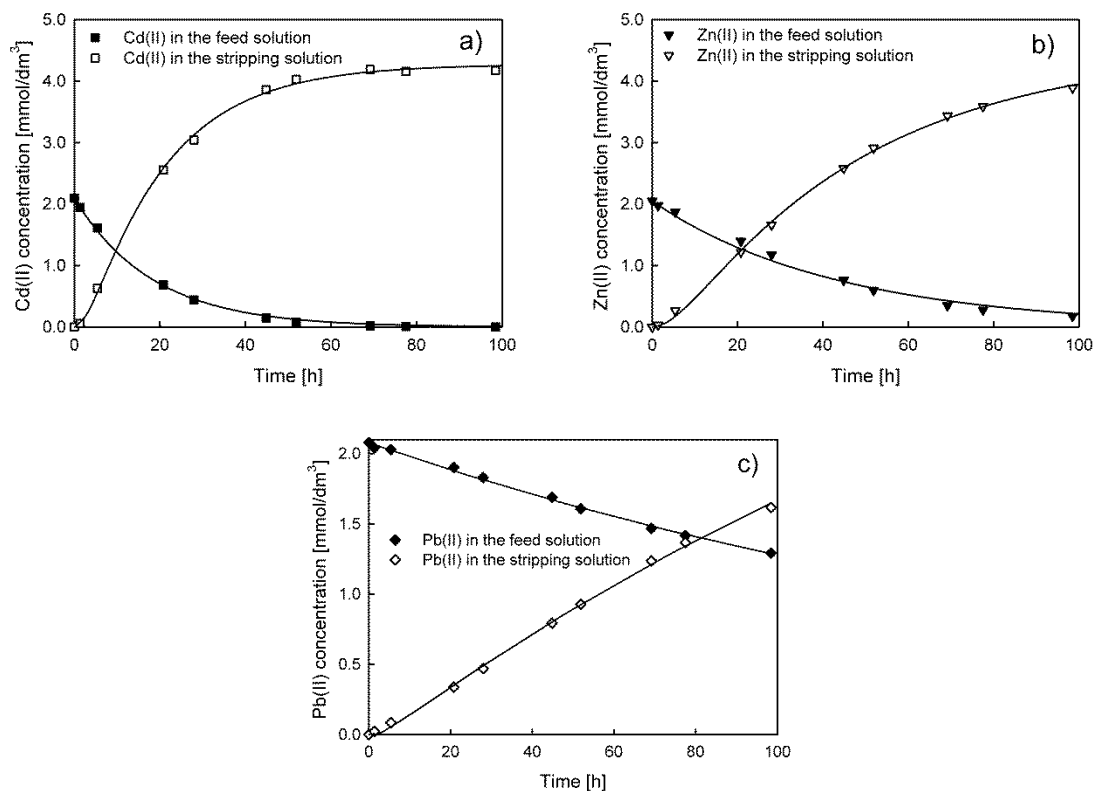

Figure S3. The best fitted models for predicting Cd(II) (a), Zn(II) (b), and Pb(II) (c) ions transport through PIM with Aliquat 336 as a carrier.

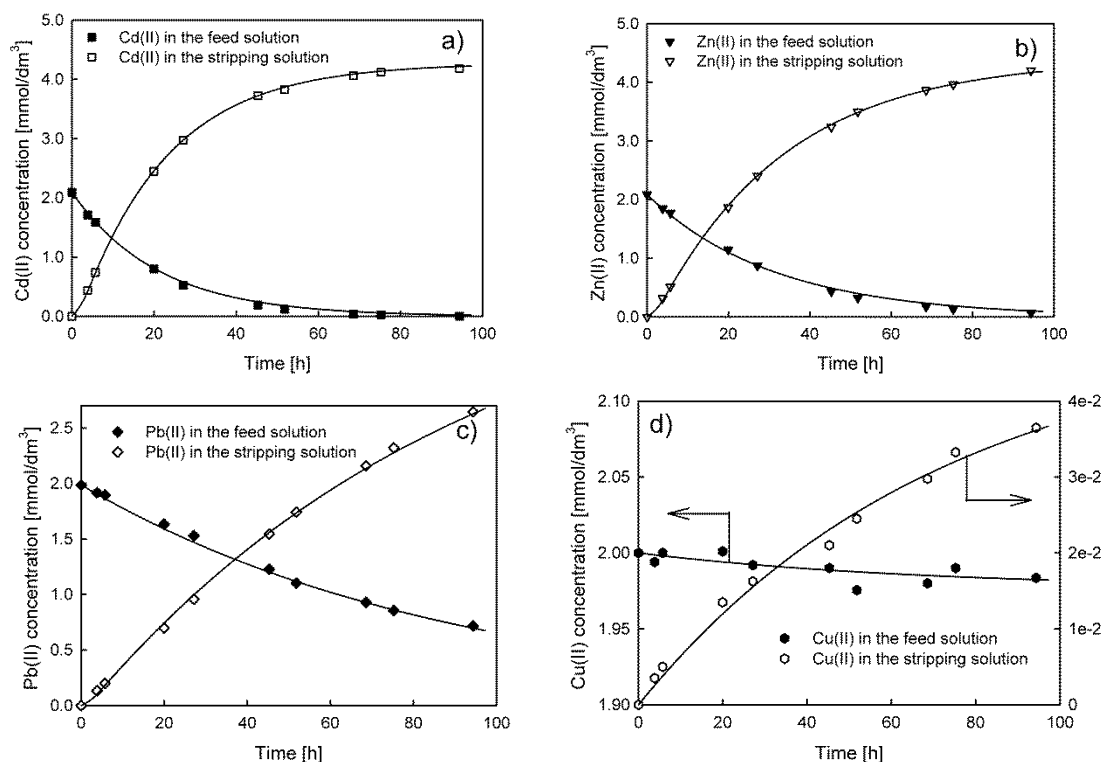

Figure S4. The best fitted models for predicting Cd(II) (a), Zn(II) (b), Pb(II) (c), and Cu(II) (d) ions transport through PIM with Cyphos IL 101 as a carrier.

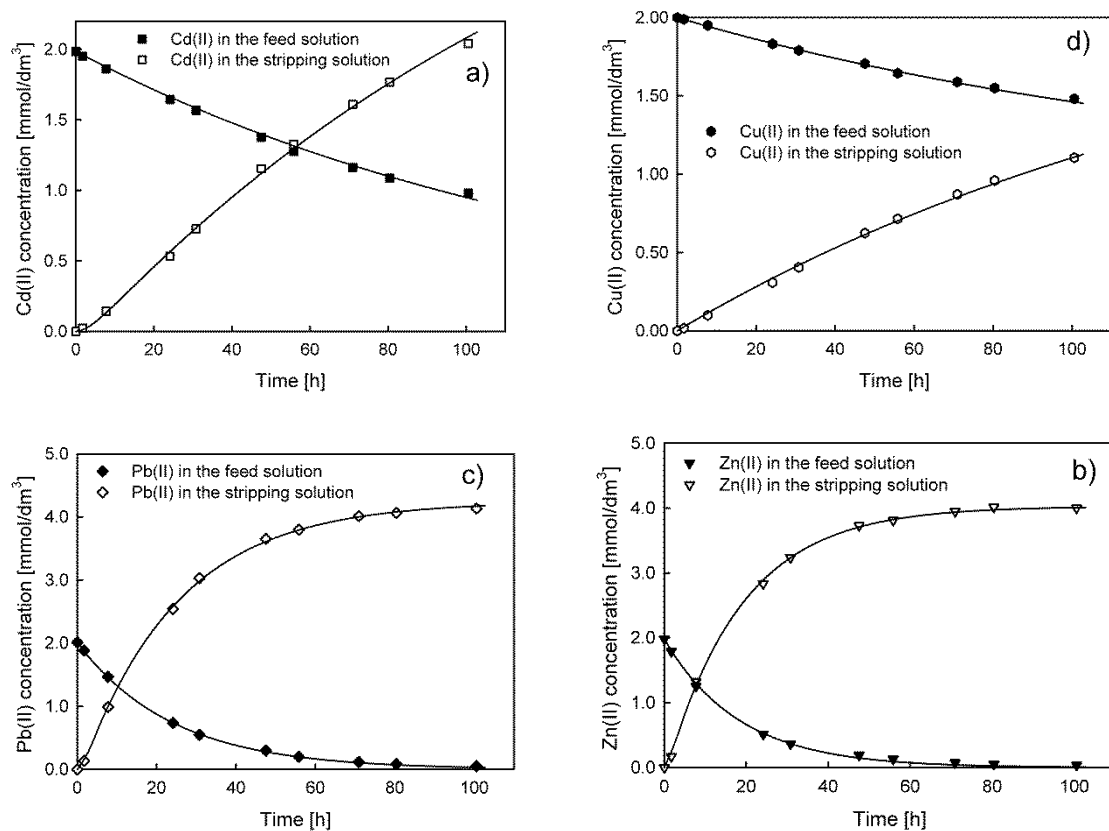

Figure S5. The best fitted models for predicting Cd(II) (a), Zn(II) (b), Pb(II) (c), and Cu(II) (d) ions transport through PIM with D2EHPA as a carrier.

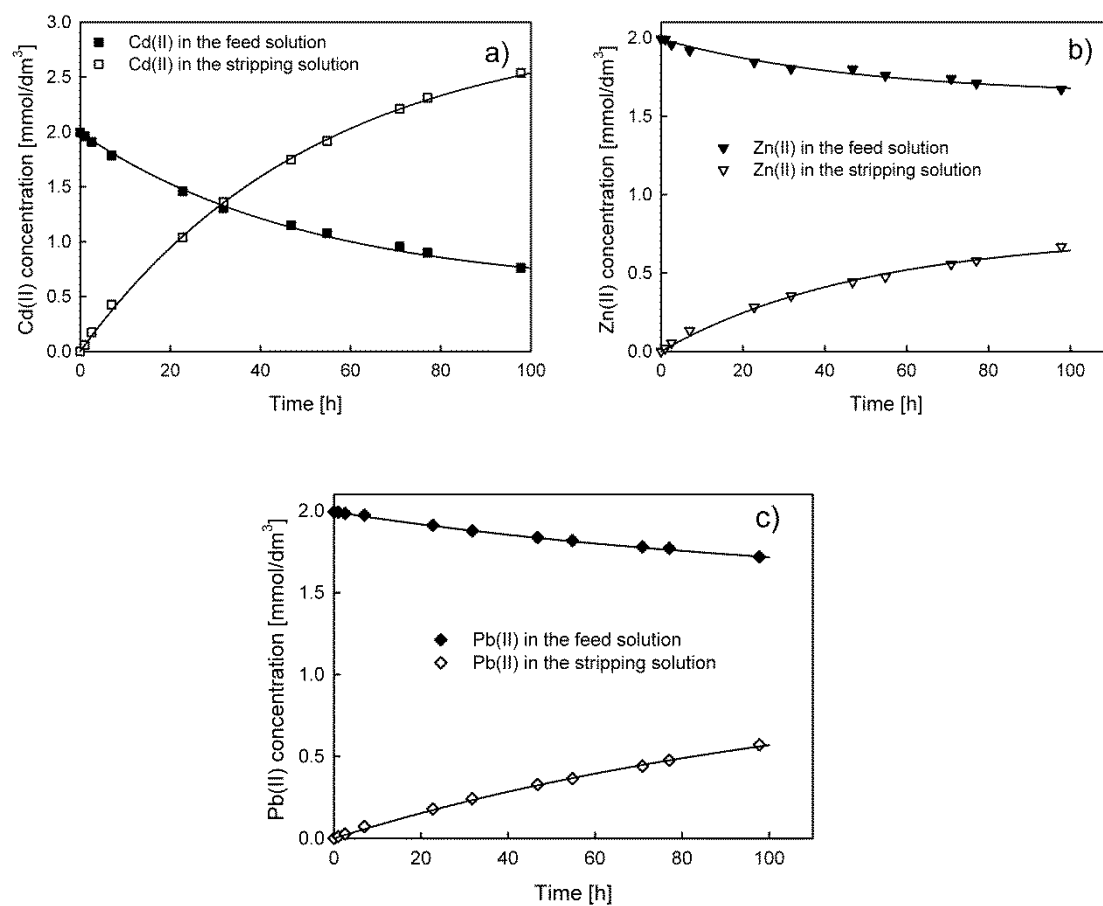

Figure S6. The best fitted models for predicting Cd(II) (a), Zn(II) (b), and Pb(II) (c) ions transport through PIM with a reactive ionic liquid (RILC8\_Br) as a carrier.
